# Supplementary material
Source: Copernicus journal article supplement (doi:10.5194/egusphere-2026-548)
Supplement: Supplementary file 1 [file egusphere-2026-548-supplement.pdf]

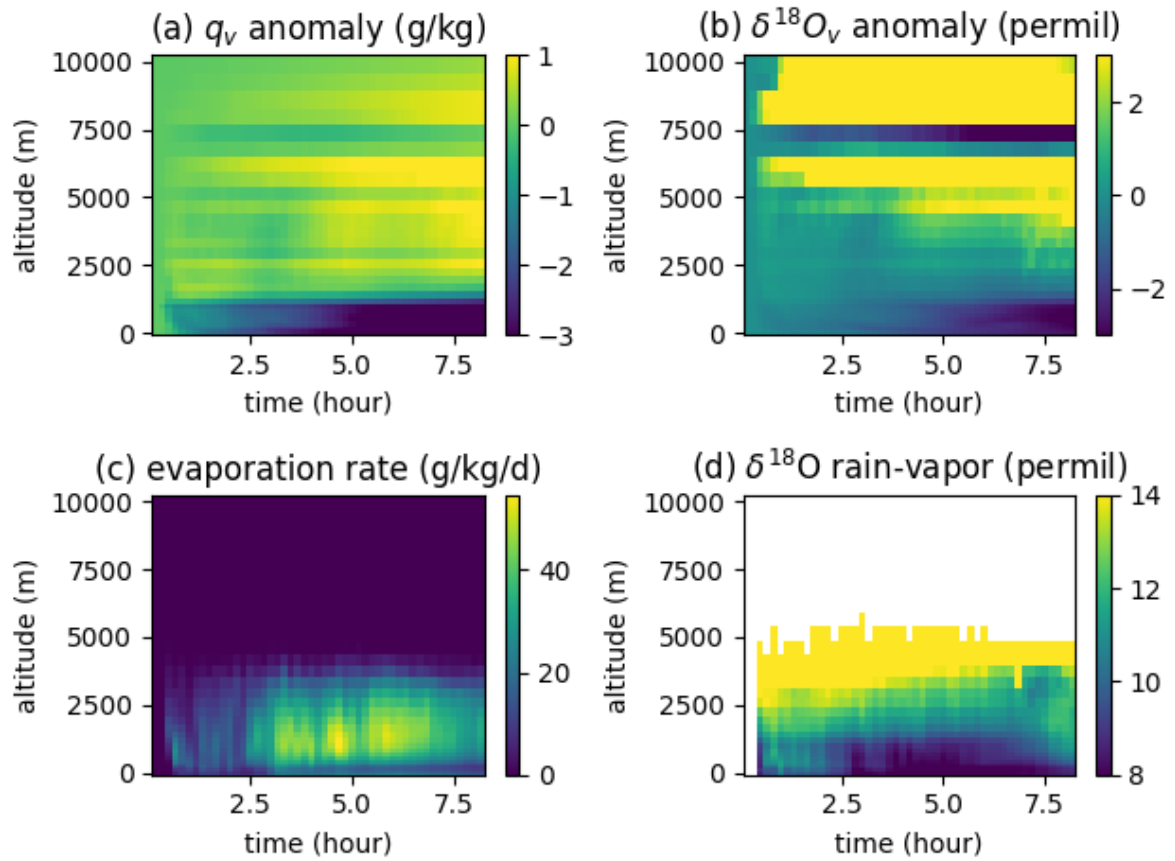

Figure S1. Evolution of some vertical profiles along the course of the simulation: (a) specific humidity ( $q_v$ , g/kg) anomaly with respect to the initial vertical profile, (b) isotopic composition of water vapor ( $\delta^{18}O_v$ , ‰) anomaly with respect to the initial vertical profile, (c) rain evaporation rate (g/kg/day), (d) difference between the isotopic composition of rain and that of the water vapor ( $\delta^{18}O_p - \delta^{18}O_v$ ).

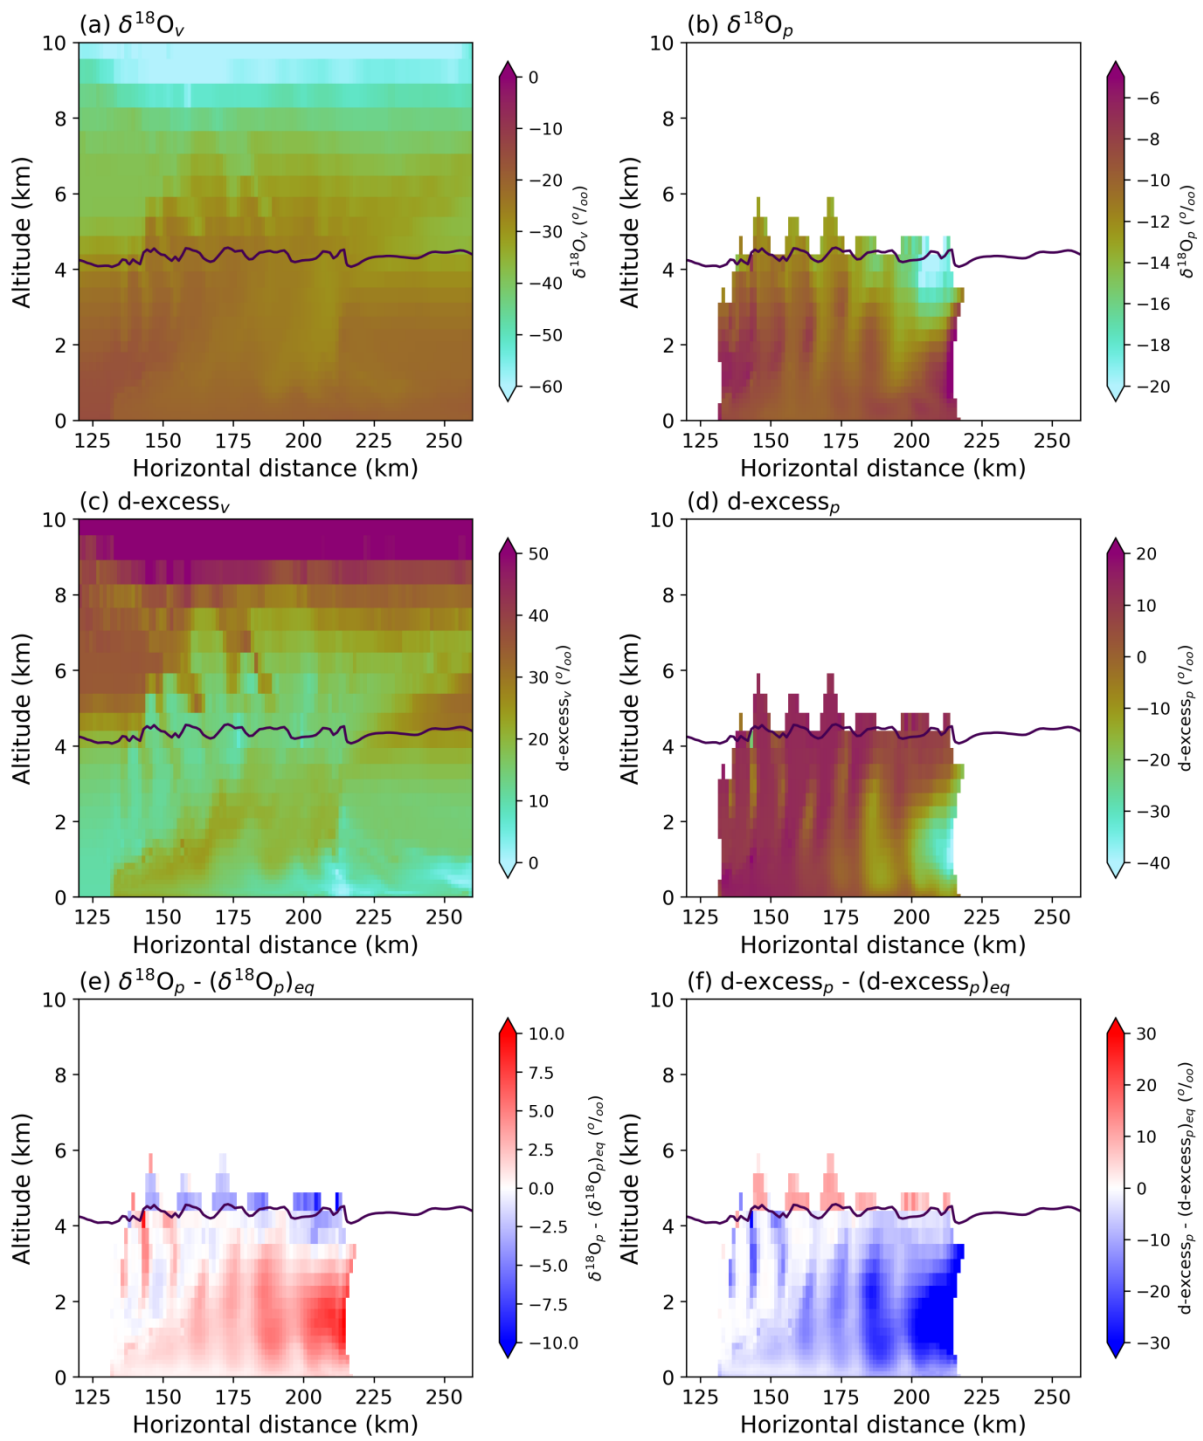

**Figure S2.** Same as Figure 6 with absolute values.

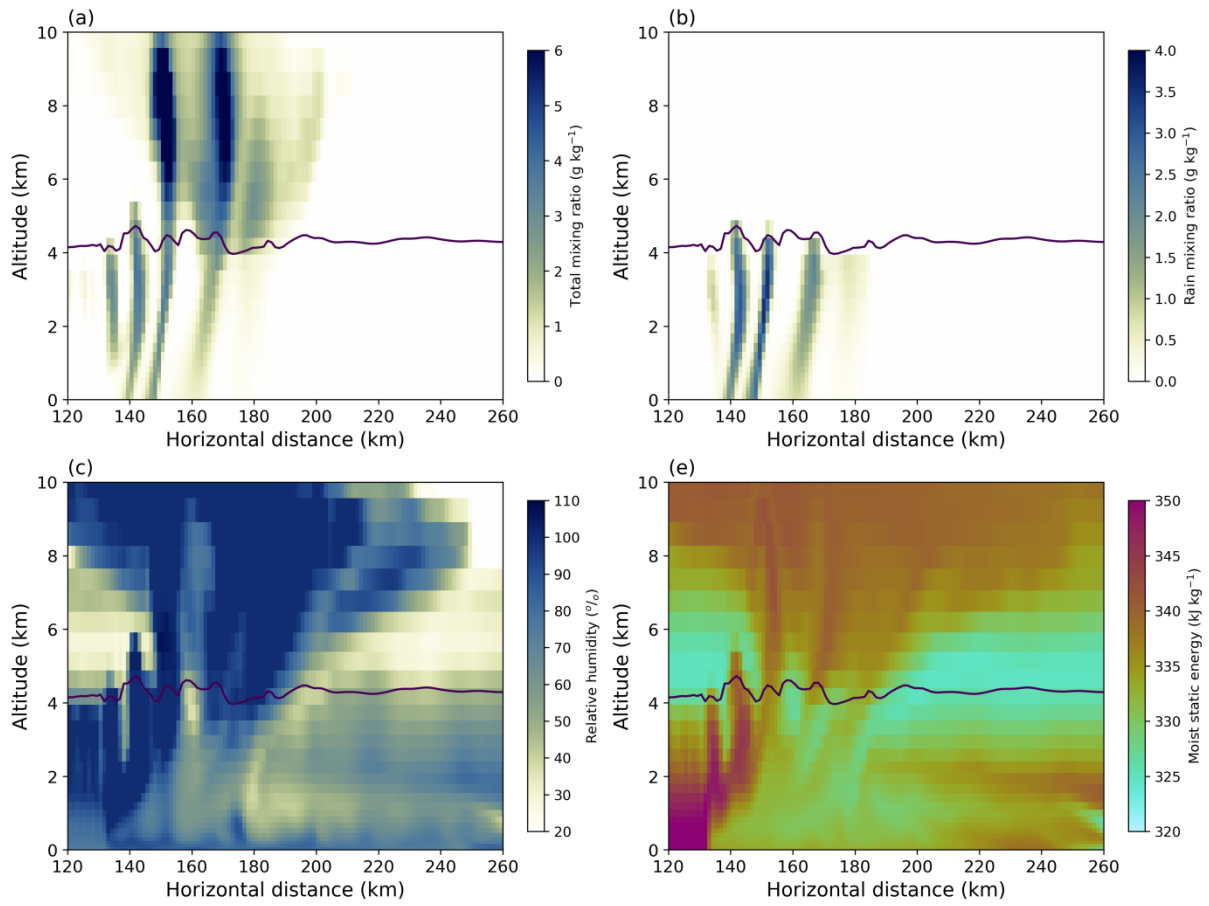

**Figure S3.** Same as Figure 4 after 4 hours of simulation.

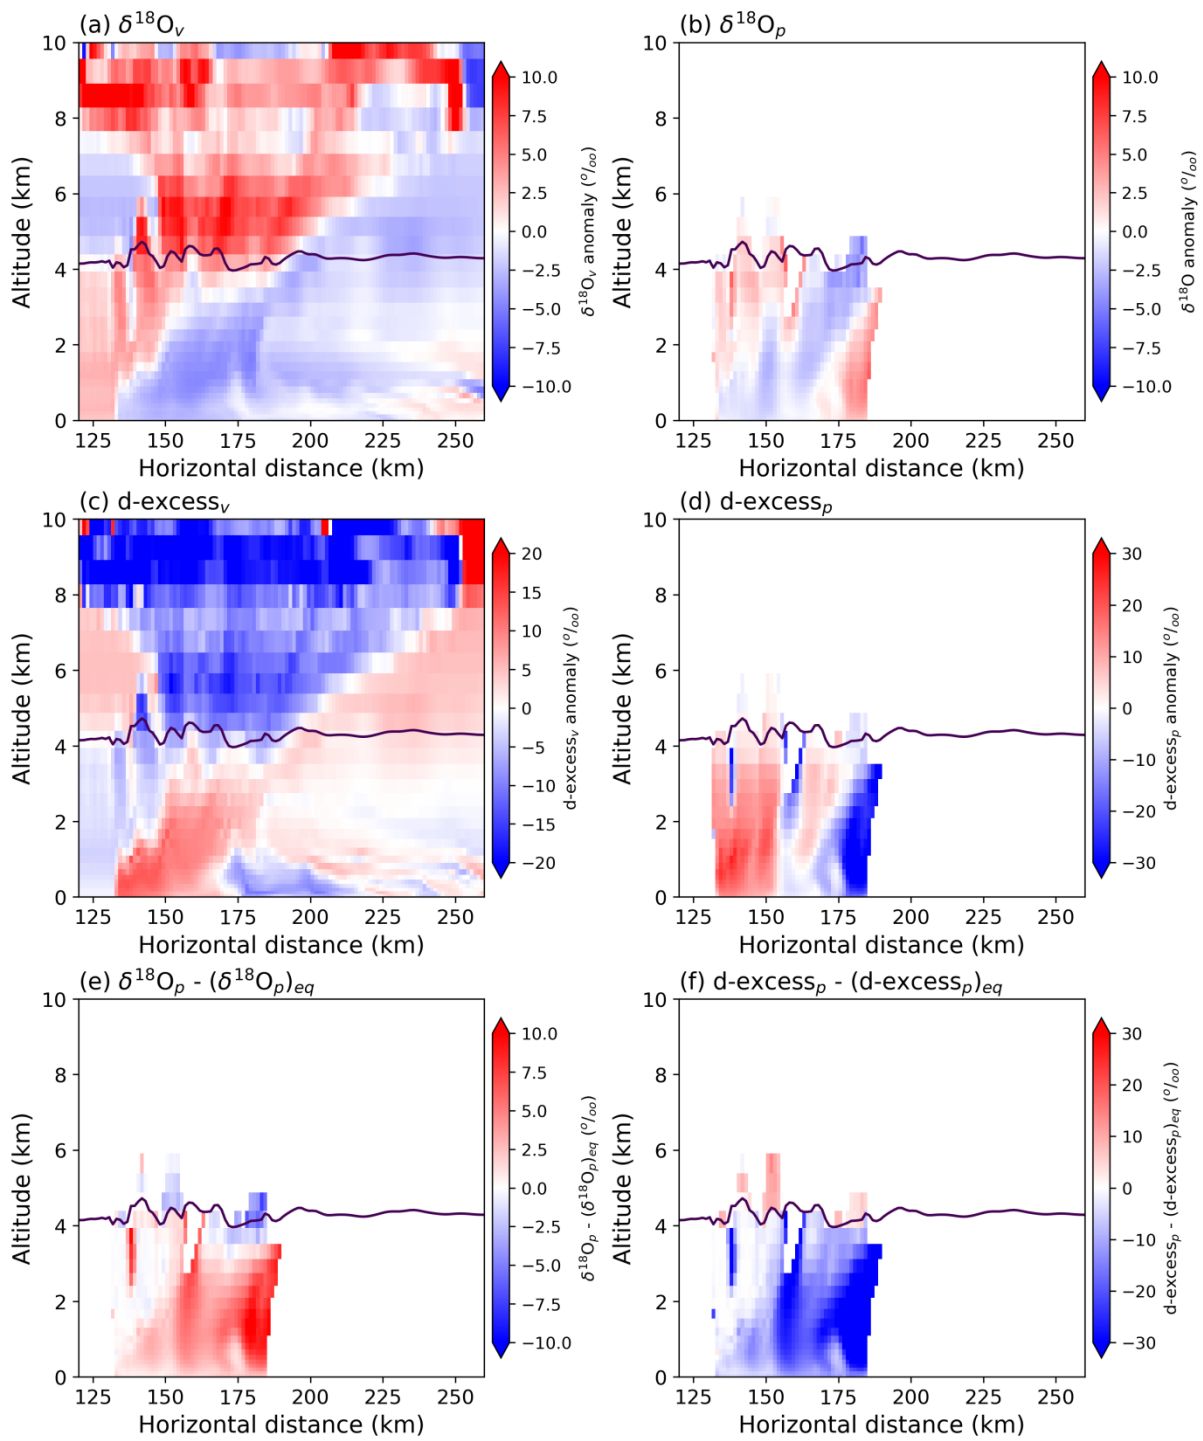

**Figure S4.** Same as Figure 6 after 4 hours of simulation.

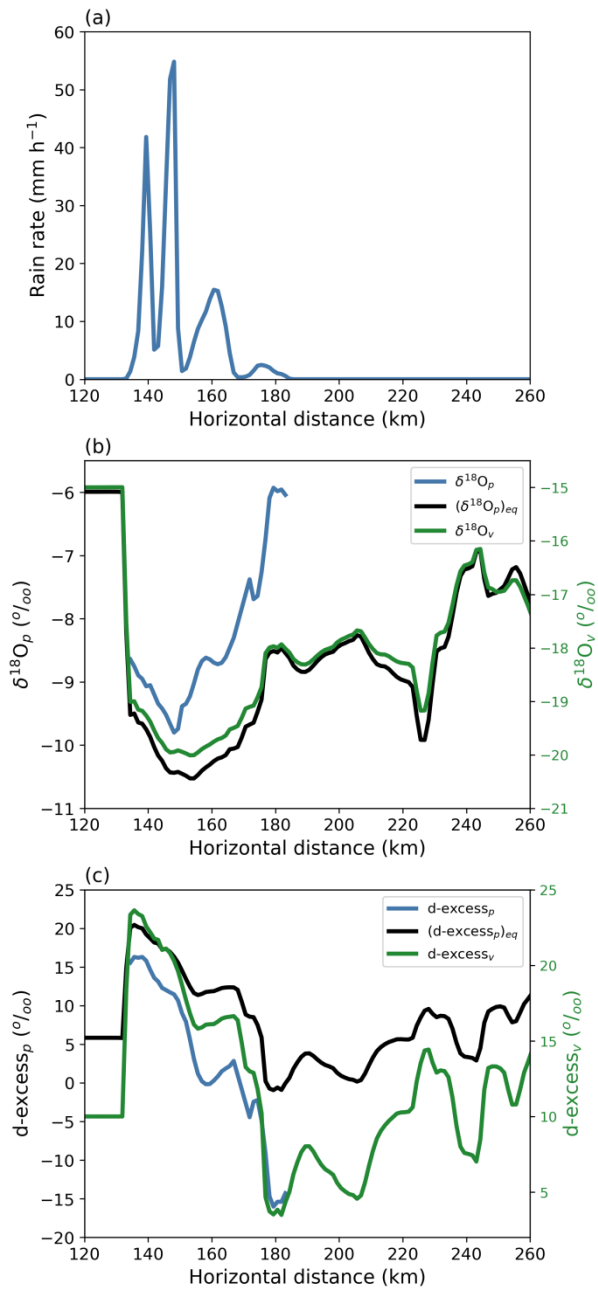

**Figure S5.** Same as Figure 7 after 4 hours of simulation.

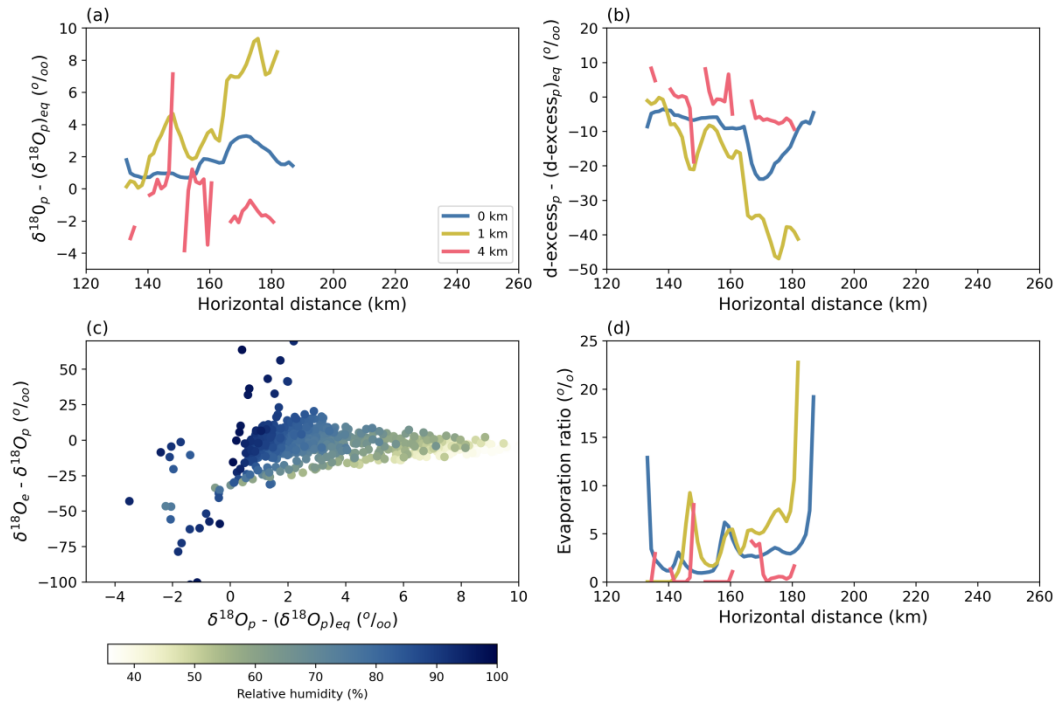

**Figure S6.** Same as Figure 8 after 4 hours of simulation.

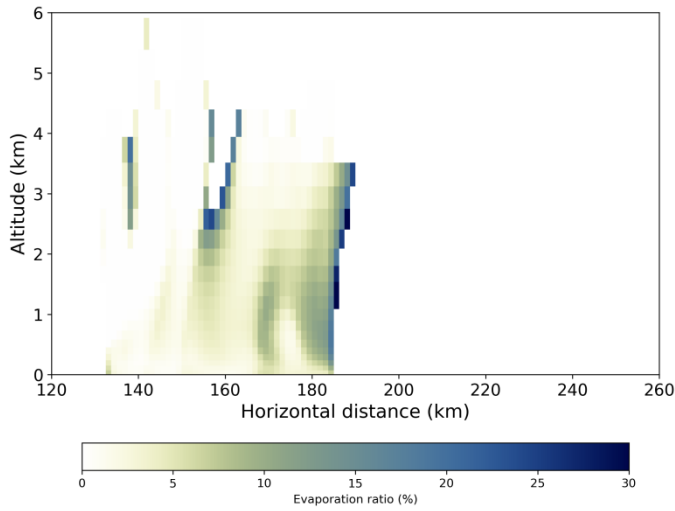

**Figure S7.** Same as Figure 9 after 4 hours of simulation.
